# Supplementary material for: Additive-free spin coating of tin oxide thin films: synthesis, characterization and evaluation of tin β-ketoiminates as a new precursor class for solution deposition processes
Source: Royal Society of Chemistry journal article supplement (doi:10.1039/d0dt01463j), 2020-01-01
Supplement: d0dt01463j1.pdf [file d0dt01463j1.pdf]

## Supplementary Information

# **Additive-free spin coating of tin oxide thin films: Synthesis, characterization and evaluation of tin $\beta$ -ketoiminates as a new precursor class for solution deposition processes**

Niklas Huster,<sup>a</sup> David Zanders,<sup>a</sup> Sarah Karle,<sup>a</sup> Detlef Rogalla<sup>b</sup> and Anjana Devi<sup>\*a</sup>

---

<sup>a</sup> *Inorganic Materials Chemistry, Faculty of Chemistry and Biochemistry, Ruhr  
University Bochum, 44801 Bochum, Germany*

<sup>b</sup> *RUBION, Ruhr University Bochum, 44801 Bochum, Germany*

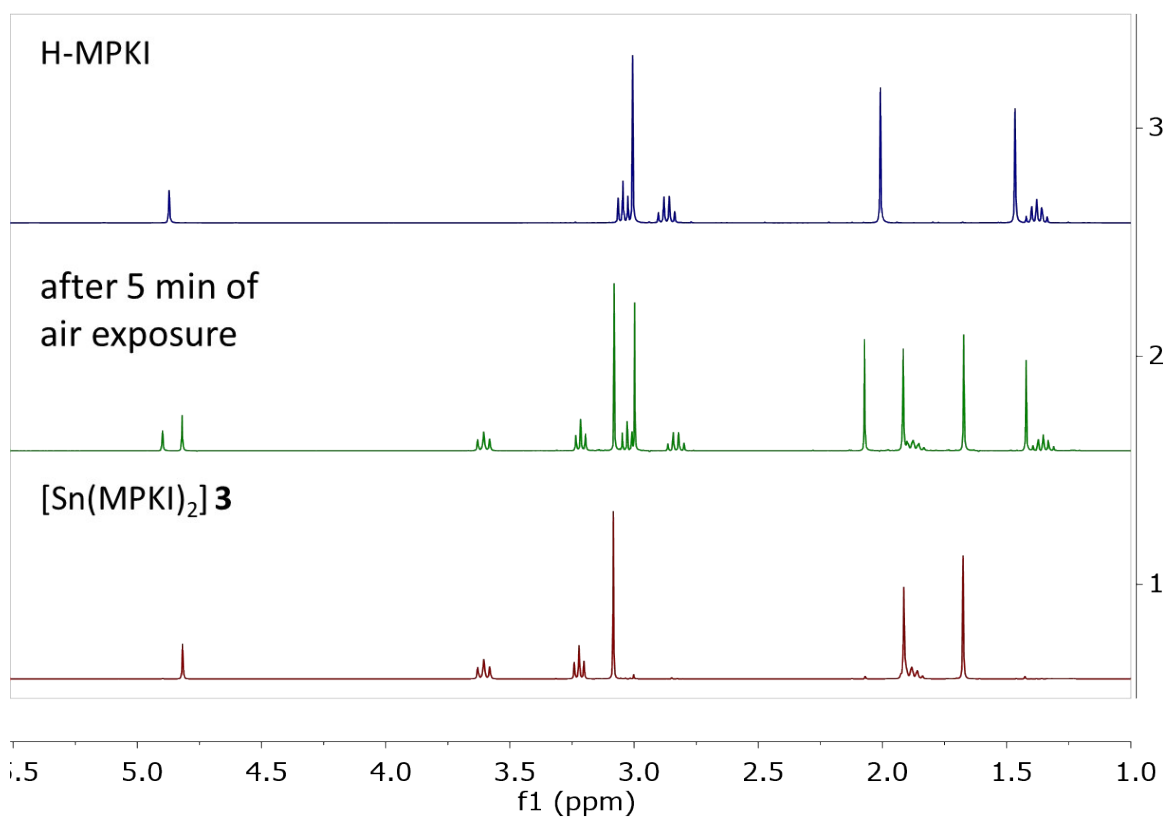

**Figure S11** Zoomed section of the low-field shifted region (in which the N-bound proton of free  $\beta$ -ketoiminato-ligand can typically be found) for comparative  $^1\text{H}$  NMR spectra of **3**  $[\text{Sn}(\text{MPKI})_2]$  (red, bottom, 1), **3**  $[\text{Sn}(\text{MPKI})_2]$  after 5 min of air exposure (middle, green, 2) and the free protonated ligand H-MPKI (top, blue, 3) in  $\text{C}_6\text{D}_6$ .

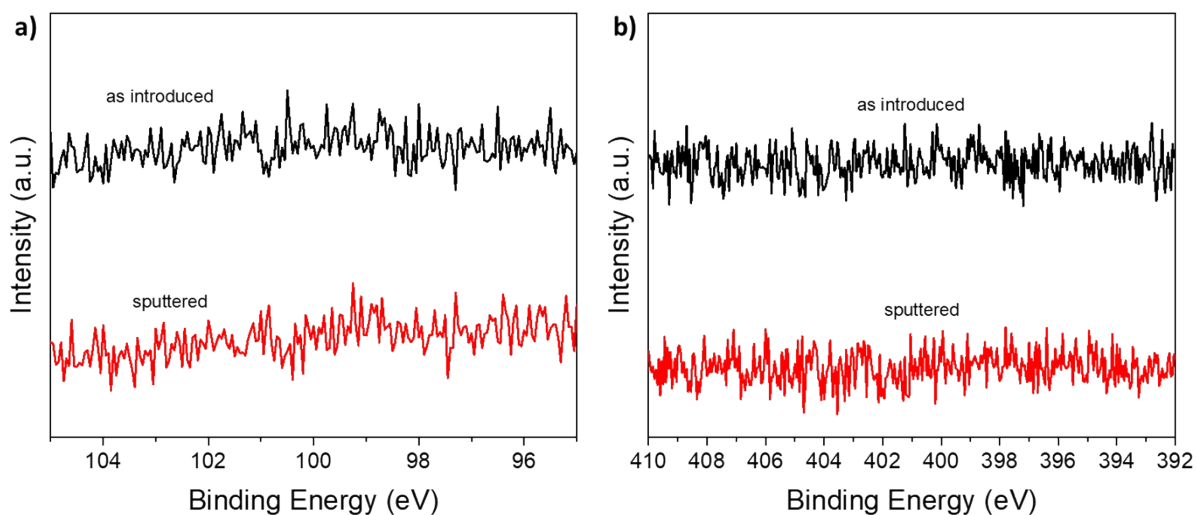

**Figure S12** XPS core level spectra for a  $\text{SnO}_2$  thin film deposited with optimized process parameters on Si(100) and annealed at  $700^\circ\text{C}$ : as introduced (black) and 2 min sputter cleaned (red) for a) Si 2p and b) N 1s regions.

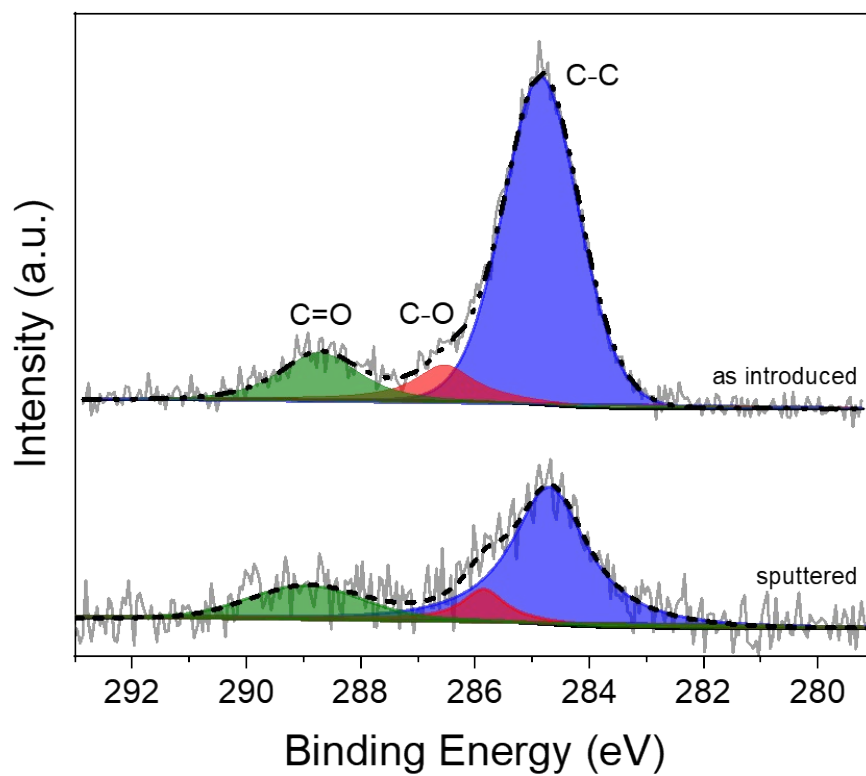

**Figure S13** XPS C 1s core level spectra for a SnO<sub>2</sub> thin film deposited with optimized process parameters on Si(100) and annealed at 700 °C: as introduced (top) and after 2 min of sputtering (bottom).
